# Supplementary material for: Beyond Glioma: The Utility of Radiomic Analysis for Non-Glial Intracranial Tumors
Source: MDPI journal article supplement (doi:10.3390/cancers14030836), 2022-02-07
Supplement: s1 [file s1]

# Supplementary Materials: Beyond Glioma: The Utility of Radiomic Analysis for Non-Glioma Intracranial Tumors

Darius Kalasauskas, Michael Kosterhon, Naureen Keric, Oliver Korczynski, Andrea Kronfeld, Florian Ringel, Ahmed Othman and Marc A. Brockmann

**Table S1.** A brief overview of radiomic research related to other less common CNS tumors.

| Tumor entity | Number of patients | Imaging Sequences used        | Number of features extracted | Feature selection approach                                                                                                                  | Model building approach                            | Validation                               | Accuracy             | Remarks           | Reference |
|--------------|--------------------|-------------------------------|------------------------------|---------------------------------------------------------------------------------------------------------------------------------------------|----------------------------------------------------|------------------------------------------|----------------------|-------------------|-----------|
| L            | 195                | T1CE, DWI                     | 936                          | mRMR, correlation based, backward elimination                                                                                               | SVM, GLM, RF, MLP, human readers, convolutional NN | Internal validation, external validation | AUC up to 0.99       | L vs. GBM         | [58]      |
| L            | 154                | T1CE, DWI                     | 1618                         | 12 methods in total                                                                                                                         | 8 machine learning classifiers                     | Internal validation, external validation | AUC 0.94             | L vs. GBM         | [62]      |
| L            | 143                | T1CE                          | 36                           | Correlation filter, PCA, model in-built classifier                                                                                          | 12 machine learning classifiers                    | Cross-validation                         | AUC up to 0.92       | L vs. GBM         | [46]      |
| L            | 94                 | T1, T2, DWI, FLAIR, T1CE      | 1070                         | 45 combinations of feature selection and model building methods                                                                             |                                                    | Cross-validation                         | AUC up to 0.98       | L vs. GBM         | [47]      |
| L            | 289                | T1CE, FLAIR, DWI              | 851                          | convolutional NN, mRMR                                                                                                                      | convolutional NN, LASSO                            | Cross-validation                         | AUC up to 0.96       | L vs. GBM         | [55]      |
| L            | 138                | T1CE                          |                              | RF, LASSO, Xgboost, gradient boosting decision tree                                                                                         | LDA, SVM, LR                                       | Internal validation                      | AUC up to 0.98       | L vs. GBM         | [54]      |
| L            | 240                | T1CE, FLAIR, DWI              | 851                          | ICC, correlation matrix, mRMR                                                                                                               | LASSO                                              | Cross-vendor, mixed-vendor               | AUC up to 0.94       | L vs. GBM         | [55]      |
| L            | 77                 | <sup>18</sup> F-FDG-PET       | 107                          | ICC, individual feature performance                                                                                                         | individual feature performance                     | Cross-validation                         | AUC up to 0.97       | L vs. GBM         | [49]      |
| L            | 143                | T1CE, T2, DWI, FLAIR          | 127                          | mRMR, LASSO                                                                                                                                 | LR, SVM, RF                                        | External validation                      | AUC 0.96             | L vs. GBM         | [50]      |
| L            | 77                 | T1CE, T2, FLAIR               | 6366                         | Recursive feature elimination                                                                                                               | RF                                                 | Cross-validation                         | AUC 0.92             | L vs. GBM         | [51]      |
| L            | 96                 | T1CE                          | 16384                        | genetic algorithm                                                                                                                           | SVM                                                | Internal validation                      | AUC 0.98             | L vs. GBM         | [52]      |
| L            | 60                 | T1CE                          | 67                           | ICC                                                                                                                                         | PCA, Hierarchical clustering                       |                                          |                      | L vs. GBM         | [53]      |
| L            | 95                 | T1, T1CE, T2, FLAIR           | 26                           | t-test                                                                                                                                      | SVM                                                | Cross-validation                         | Accuracy 97%         | L vs. GBM         | [56]      |
| L            | 9                  | T1, T1CE, T2, FLAIR, ADC, DWI | 198                          |                                                                                                                                             | Mann-Whitney U                                     |                                          | AUC more than 0.97   | L vs. sarcoidosis | [57]      |
| M            | 18                 | T1CE, T2, ADC                 | 46                           | Information Gain, Gini index, ReliefF, and Fast Correlation Based Filter                                                                    | LR, NB, kNN, SVM, RF, NN                           | Cross-validation                         | AUC 0.96             | Consistency       | [92]      |
| M            | 131                | T1 FLAIR, T1CE FLAIR, T2      | 1409                         | The Variance Threshold method, Select K Best method, LASSO                                                                                  | LR, kNN; DT, SVM, RF, XGBoost                      | Internal validation                      | AUC 0.96             | WHO grade         | [75]      |
| M            | 175                | T1CE                          | 1055                         | PCA, variance, correlation                                                                                                                  | RF                                                 | Internal validation                      | AUC 0.78*            | WHO grade         | [78]      |
| M            | 150                | T1CE                          | 40                           | Distance correlation, LASSO, gradient boosting decision tree                                                                                | LDA, SVM                                           | Internal validation                      | AUC up to 0.93       | WHO grade         | [80]      |
| M            | 152                | ADC                           | 156                          | Mutual information, Fisher coefficient and classification error probability, average correlation coefficient, recursive feature elimination | DT, conditional inference tree, decision forest    | Internal validation                      | Accuracy up to 79.5% | WHO grade         | [79]      |

|    |      |                                             |       |                                                                                                                               |                                                                |                                            |                                        |                                    |      |
|----|------|---------------------------------------------|-------|-------------------------------------------------------------------------------------------------------------------------------|----------------------------------------------------------------|--------------------------------------------|----------------------------------------|------------------------------------|------|
| M  | 138  | T1, T1CE, subtraction maps, FLAIR, ADC, T2, | 12733 | Mann-Whitney U                                                                                                                | RF, SVM, XGBoost, multilayer perception                        | Internal validation, multicentric cohort   | AUC 0.97                               | WHO grade                          | [59] |
| M  | 316  | T1, T2, T1CE, ADC, SWI                      | 3884  | ICC, LASSO                                                                                                                    | RF, SMOTE                                                      | Cross-validation                           | AUC 0.84                               | WHO Grade                          | [82] |
| M  | 181  | T1CE                                        | 2048  | RF                                                                                                                            | LDA                                                            | Internal validation, multicentric cohort   | AUC 0.90                               | WHO Grade                          | [76] |
| M  | 136  | T1CE, ADC, DTI                              | 90    | recursive feature elimination                                                                                                 | SVM, RF                                                        | Internal validation, cross-validation      | AUC 0.86                               | WHO Grade                          | [81] |
| M  | 241  | T1CE                                        | 385   | Fisher discriminant analysis, Spearman correlation, t test                                                                    | Fisher discriminant analysis                                   | Cross-validation                           | Accuracy >91.3%                        | subgroup                           | [90] |
| M  | 108  | T1CE                                        | 36    |                                                                                                                               | RF                                                             | Cross-validation                           | AUC 0.74                               | Brain invasion                     | [98] |
| M  | 454  | T1CE, T2                                    | 3222  | LASSO                                                                                                                         | RF                                                             | Internal validation                        | AUC 0.91                               | Brain invasion                     | [96] |
| M  | 1728 | T1CE, T2                                    | 3190  | LASSO                                                                                                                         | SVM                                                            | External validation                        | AUC 0.82*                              | Brain invasion                     | [95] |
| M  | 490  | T1CE, T2                                    | 1227  | Spearman's correlation, least absolute shrinkage, LASSO                                                                       | LR                                                             | Internal validation                        | AUC 0.72                               | Bone invasion                      | [99] |
| M  | 25   | ADC, DCE, T1, T2, FLAIR                     | 300   | LASSO                                                                                                                         |                                                                | Cross-validation                           | AUC>0.71                               | Tumor vs. edema                    | [97] |
| M  | 136  | T1CE, T2                                    | 3124  | Wilcoxon rank sum test, Elastic net, recursive feature elimination                                                            | SVM                                                            | Internal validation                        | AUC 0.80                               | Postoperative edema                | [94] |
| M  | 292  | T1, T1CE, T2                                | 473   | concordance correlation coefficient, ICC, 16 feature selection algorithms                                                     | LR, DT, RF, SVM                                                | Internal validation                        | AUC 0.92                               | M vs. solitary fibrous tumor       | [84] |
| M  | 192  | T1, T1CE, T2                                | 396   | t-test, Kruskal-Wallis, LR, LASSO, stepwise iterative method                                                                  | LR                                                             | Internal validation                        | AUC 0.94                               | M vs. solitary fibrous tumor       | [85] |
| M  | 67   | T1CE, DWI, FLAIR                            | 486   | Boruta algorithm                                                                                                              | SVM                                                            | Internal validation                        | AUC up to 0.90                         | M vs. solitary fibrous tumor       | [86] |
| M  | 127  | T1CE, T2                                    | 46    | Mann-Whitney U                                                                                                                | LR                                                             |                                            | AUC up to 0.78                         | M vs. craniopharyngeoma            | [89] |
| M  | 303  | T1CE                                        | 172   | supervised false-positive avoidance methodology                                                                               | RF                                                             | External validation                        | AUC>0.75                               | Prognosis                          | [77] |
| M  | 138  | T1CE, T2, ADC                               | 99    | RF                                                                                                                            | DT                                                             | Cross-validation                           | Accuracy 90%                           | Recurrence                         | [91] |
| MB | 122  | T1, T1CE, FLAIR, ADC                        | 5529  | ICC, correlation matrix, RF-based                                                                                             | RF + clinical features                                         | Internal validation                        | AUC up to 0.91*                        | subgroup                           | [70] |
| MB | 51   | T1CE, ADC                                   | 188   | Student's t, MannWhitney U, LR                                                                                                | kNN, AdaBoost, SVM, RF                                         | Cross-validation                           | AUC 0.91                               | MB vs. Ependymoma                  | [63] |
| MB | 40   | T1CE, T2, ADC                               | 37    | Feature combination                                                                                                           | SVM                                                            | Cross-validation                           | Accuracy 92%                           | MB vs. ependymoma vs.. astrocytoma | [68] |
| MB | 40   | T1, T2                                      | 279   | PCA                                                                                                                           | LDA, probabilistic NN                                          | Cross-validation                           | Accuracy more then 86%                 | MB vs. ependymoma vs.. astrocytoma | [65] |
| MB | 248  | ADC                                         | 24    |                                                                                                                               | DT, NB, RF, SVM, NN                                            | Cross-validation                           | AUC 0.87                               | Entity posterior fossa             | [67] |
| MB | 288  | T1CE, T2, ADC                               | 3087  | Tree-Based Pipeline Optimization Tool, 13 feature selection algorithms                                                        | Tree-Based Pipeline Optimization Tool, 10 classifiers          | Internal validation<br>Multicentric cohort | AUC 0.92                               | Entity posterior fossa             | [64] |
| MB | 185  | T1CE, FLAIR                                 | 10    | Mann-Whitney U                                                                                                                | LR                                                             |                                            | AUC up to 0.880                        | Entity posterior fossa             | [69] |
| MB | 134  | T1, T2                                      | 566   | ReliefF, entropy minimum descriptive length discretisation,                                                                   | SVM                                                            | External validation, cross-validation      | AUC up to 0.86                         | Tumor entity pediatric population  | [66] |
| MB | 109  | T1CE, T2                                    | 590   | Wilcoxon rank sum test                                                                                                        | SVM                                                            | Cross-validation, external validation      | AUC up to 0.80**                       | subgroup                           | [71] |
| MB | 84   | T1CE                                        | 385   | mRMR, LASSO                                                                                                                   | LR                                                             | Internal validation, external validation   | AUC 0.73*                              | CSF dissemination                  | [73] |
| MB | 166  | T1, T1CE, ADC, FLAIR, T2                    | 5929  | ICC, univariate concordance index, LASSO<br>Cox model                                                                         | Regression                                                     | Internal validation                        | C-index up to 0.762*                   | survival                           | [72] |
| BM | 48   | CE T1, FLAIR, APTw                          | 110   | ICC, classifier attribute evaluation filter (CfsSubsetEval)<br>Machine Learning Classifiers (NN)<br>Random Forest Classifiers | Machine Learning Classifiers (NN)<br>Random Forest Classifiers | n.a.                                       | sensitivity 81.3%<br>specificity 81.1% | BM vs. primary brain tumors        | [17] |

|    |     |                                         |      |                                                                                                                                                                   |                                                                |                                                                          |                                  |                                    |       |
|----|-----|-----------------------------------------|------|-------------------------------------------------------------------------------------------------------------------------------------------------------------------|----------------------------------------------------------------|--------------------------------------------------------------------------|----------------------------------|------------------------------------|-------|
| BM | 31  | MRF (magnetic resonance fingerprinting) | n.a. | Spearman's rank correlation coefficient<br>Wilcoxon rank sum test                                                                                                 | n.a.                                                           | n.a.                                                                     | AUC 0.87-0.95                    | BM vs. primary brain tumors        | [20]  |
| BM | 166 | T2 CE                                   | 265  | No selection                                                                                                                                                      | DNN<br>7 classic machine learning classifiers                  | cross validation<br>external validation cohort (82 Pat., 50 GBM, 32 Met) | AUC 0.96                         | BM vs. primary brain tumors        | [138] |
| BM | 120 | T1, T2, T1CE                            | 321  | ICC<br>Boruta algorithm                                                                                                                                           | DT, SVM, neural networkNN, NB, KNN                             | Internal validation                                                      | Accuracy 0.64                    | BM vs. primary brain tumors        | [11]  |
| BM | 412 | T1, T2, T1CE                            | 1303 | Filter methods (T-test-score, Relief, information gain, gain ratio, Euclidean distance, F-anova (FAOV), Wilcoxon rank sum, LR, mutual information, SVM, LASSO, RF | Adaboost, kNN, MLP, DT, NB, RF, SVM                            | Internal validation                                                      | AUC 0.90                         | BM vs. primary brain tumors        | [10]  |
| BM | 439 | T1CE                                    | 757  | neighborhood component analysis (NCA), PCA                                                                                                                        | SVM, kNN, DT<br>ensemble classifiers                           | Internal validation                                                      | AUC = 0.96*                      | BM vs. primary brain tumors        | [8]   |
| BM | 100 | T1CE                                    | 88   | p-value                                                                                                                                                           | SVM<br>Naive Bayes<br>k-nearest neighbors                      | Cross-validation                                                         | AUC 0.90                         | BM vs. primary brain tumors        | [12]  |
| BM | 134 | T1, T1CE, T2, FLAIR                     | 43   | distance correlation,<br>RF, LASSO,<br>eXtreme gradient boosting (Xgboost),<br>Gradient Boosting Decision Tree                                                    | LDA, SVM, RF, kNN, LR, LDA,<br>SVM, RF, kNN, Gaussian NB, LR   |                                                                          | AUC = 0.80                       | BM vs. primary brain tumors        | [9]   |
| BM | 120 | T1, T1CE, T2, FLAIR, ADC                | 1070 | PCA, linear combinations filter, h                                                                                                                                | 12 models in total                                             | Cross-validation                                                         | AUC up to 0.95                   | BM vs. primary brain tumors        | [13]  |
| BM | 48  | DTI                                     | 11   |                                                                                                                                                                   | NB, kNN, SVM, quadratic discrimination analysis, NN            | Cross-validation                                                         | AUC up to 0.99                   | BM vs. primary brain tumors        | [18]  |
| BM | 67  | T1CE                                    | 36   | Wilcoxon rank sum test                                                                                                                                            | Probabilistic NN, binary decision tree                         | Cross-validation                                                         | Accuracy more than 93%           | BM vs. primary brain tumors        | [16]  |
| BM | 144 | CT CE                                   | 105  | Mann-Whitney-U-Test, LASSO                                                                                                                                        | Binary LR, SVM, SVM + age and sex                              | Cross-validation                                                         | AUC 0.83                         | Differentiation different BM types | [32]  |
| BM | 189 | T1, T1CE, FLAIR                         | 1423 | Gini impurity measures                                                                                                                                            | RF                                                             | Cross-validation                                                         | AUC = 0.64-0.82                  | Differentiation different BM types | [29]  |
| BM | 38  | T1CE                                    | 43   | ANOVA, F-Test, Welch's t-Test                                                                                                                                     | RF                                                             | Cross-validation                                                         | AUC = 0.61-0.94                  | Differentiation different BM types | [30]  |
| BM | 30  | T1CE                                    | 43   | Welch's t-test                                                                                                                                                    | NB, kNN, multilayer perception, RF, SVM, NB, kNN, MLP, RF, SVM | Cross-validation                                                         | AUC = 0.95                       | Differentiation different BM types | [31]  |
| BM | 157 | FLASH T1 CE (FLASH)                     | 740  | LASSO regression,                                                                                                                                                 | NN classifier                                                  |                                                                          | accuracy 80%,<br>sensitivity 74% | response to radiation              | [39]  |
| BM | 31  | 11C-MET PET                             | 108  | correlation matrix and point-biserial correlation coefficient                                                                                                     | LDA                                                            |                                                                          | AUC 0.73                         | response to radiation              | [40]  |

|    |     |                          |                   |                                                                                                                                                                                               |                                                                             |                                       |                          |                            |      |
|----|-----|--------------------------|-------------------|-----------------------------------------------------------------------------------------------------------------------------------------------------------------------------------------------|-----------------------------------------------------------------------------|---------------------------------------|--------------------------|----------------------------|------|
| BM | 161 | T1CE                     | 107               | consensus clustering                                                                                                                                                                          | Cox proportional hazards models, cause-specific proportional hazards models |                                       | HR 0.71*                 | response to radiation      | [44] |
| BM | 87  | T1CE, FLAIR              | 440               | jackknife resampling in LOPO (leave one patient out) manner resampled RF, feature importance                                                                                                  | RF                                                                          | Cross-validation                      | AUC 0.79*                | response to radiation      | [41] |
| BM | 100 | T1CE, FLAIR              | 3072              | Pearson correlation analysis, Clustering in R-squared matrix Mann-Whitney U test in conjunction with a 50-fold sampling scheme, AUC632+ with forward feature selection, SVM classifier, ANOVA | SVM classifier + bootstrapping                                              | Cross-validation                      | AUC 0.79                 | response to radiation      | [43] |
| BM | 89  | CT                       | direct use of CNN | none                                                                                                                                                                                          | ensemble CNN                                                                | Internal validation                   | AUC 0.76-0.86            | response to radiation      | [42] |
| BM | 110 | T1CE, FLAIR              | 2,786             | mRMR                                                                                                                                                                                          | Ada Boost, Gradient Boost, RF, Extra Trees                                  | cross-validation                      | AUC 0.90-0.95*           | response to radiation      | [37] |
| BM | 88  | T1CE                     | 21                | weighted average of each radiomic feature by Met volume univariate Cox regression, false discovery rate adjustment, LASSO                                                                     | multivariate analysis                                                       | Internal validation                   | hazard ratio 0.68        | response to chemotherapy   | [45] |
| BM | 52  | T1CE, T2, FLAIR, T2, DWI | 438               | LASSO                                                                                                                                                                                         | LR                                                                          |                                       | accuracy 0.991           | mutation status            | [36] |
| BM | 61  | T1CE                     | 1209              | permutation RF, l0-norm minimization, infinite feature selection, a feature selection via concave minimization, mRMR, Relief, Laplacian                                                       | RF, AdaBoost, SVM, LASSO                                                    | Cross-validation, Internal validation | AUC up to 0.89           | mutation status            | [33] |
| BM | 53  | T1CE                     | 195               | kstest, ranksum, ttest2, and pcacov functions one-sample Kolmogorov-Smirnov test Mann-Whitney U-test or t-test PCA on features that were significantly different between the 2 groups         | SVM 7 types                                                                 | Cross-validation                      | AUC 0.78*                | mutation status            | [38] |
| BM | 110 | T1CE, FLAIR              | 2786              | mRMR, SMOTE                                                                                                                                                                                   | RF, extra tree, bagging, and gradient boosting                              | Cross-validation                      | AUC 0.92-0.99*           | mutation status            | [34] |
| BM | 51  | T1CE, DTI                | 526               | ICC, F score, mutual information, RFE, LASSO, tree-based method                                                                                                                               | SVM, adaptive boosting algorithm, LDA, RF                                   | Internal validation                   | AUC 0.73                 | mutation status            | [35] |
| BM | 20  | T1CE                     | 1766              | Cohen's Kappa                                                                                                                                                                                 | bagging algorithm trained with the chi-square score features set            | Cross-validation                      | AUC 0.83                 | Radionecrosis vs. Progress | [24] |
| BM | 41  | 11C-MET PET              | 42                | Gini index                                                                                                                                                                                    | RF                                                                          | Cross-validation                      | AUC 0.98                 | Radionecrosis vs. Progress | [28] |
| BM | 75  | T1CE                     | 1                 |                                                                                                                                                                                               | Wilcoxon rank sum test                                                      |                                       | AUC not provided, p<0.05 | Radionecrosis vs. Progress | [25] |
| BM | 66  | T1CE, FLAIR              | 51                | univariate logistic regression                                                                                                                                                                | IsoSVM, SVM                                                                 | Cross-validation                      | AUC 0.81                 | Radionecrosis vs. Progress | [22] |
| BM | 52  | T1CE, FET-PET            | 42                | Mann-Whitney-U test Limiting to 5 features                                                                                                                                                    | LR                                                                          | Cross-validation                      | AUC up to 0.96           | Radionecrosis vs. Progress | [27] |

|      |     |                          |       |                                                                                  |                                                                                                                           |                                          |                    |                                                     |       |
|------|-----|--------------------------|-------|----------------------------------------------------------------------------------|---------------------------------------------------------------------------------------------------------------------------|------------------------------------------|--------------------|-----------------------------------------------------|-------|
| BM   | 47  | FET-PET                  | 62    | AUCs > 0.7                                                                       | n.a.                                                                                                                      |                                          | AUC up to 0.85     | Radionecrosis vs. Progress                          | [26]  |
| BM   | 87  | T1, T1CE, T2, FLAIR      | 285   | concordance correlation coefficients                                             | RUSBoost ensemble classifier                                                                                              | Cross-validation                         | AUC 0.73           | Radionecrosis vs. Progress                          | [23]  |
| BM   | 115 | T1CE                     | 179   | RFE, SVM                                                                         | SVM                                                                                                                       | Cross-validation, internal validation    | AUC 0.94           | Radionecrosis vs. Progress                          | [14]  |
| P    | 133 | T1CE, T2                 | 46    | Mann–Whitney U                                                                   | LR                                                                                                                        | Internal validation                      | AUC up to 0.80     | P tumor vs. Rathke cleft cyst                       | [88]  |
| P    | 235 | T1CE                     | 40    | LASSO, distance correlation, RF, eXtreme gradient boosting, gradient boosting DT | LDA, SVM, RF, KNN; Adaboost, LR, Gaussian NB, DT ± gradient boosting                                                      | Internal validation                      | AUC more than 0.80 | P vs. M vs. Craniopharyngioma vs. Rathke cleft cyst | [87]  |
| P    | 112 | T1CE, T1                 | 1482  | mRMR                                                                             | SVM                                                                                                                       | Internal validation                      | AUC 0.804          | Subtype                                             | [109] |
| P    | 235 | T1, T1CE, T2             | 2364  | PCA                                                                              | SVM, NB, kNN                                                                                                              | Cross-validation                         | AUC up to 0.95     | Subtype                                             | [108] |
| P    | 44  | T1                       | 1021  | ICC, RF, sequential forward selection                                            | RF                                                                                                                        | Cross-validation                         | AUC more than 0.89 | Craniopharyngeoma subtype, mutations                | [111] |
| P    | 164 | T1, T1CE, T2             | 1223  | SelectKBest, LASSO, SVM with RFE                                                 | SVM                                                                                                                       | Internal validation, external validation | AUC 0.92           | Craniopharyngeoma subtype                           | [110] |
| P    | 177 | T2                       | 107   | LASSO                                                                            | RF, light gradient boosting machine, extra-trees, quadratic discrimination analysis, LDA, soft voting ensemble classifier | Internal validation                      | AUC 0.81           | Treatment response                                  | [112] |
| P    | 57  | T1, T1CE, T2             | 1561  | SVM                                                                              | LR                                                                                                                        | Cross-validation                         | AUC 0.96*          | Treatment response                                  | [116] |
| P    | 163 | T1, T1CE, T2             | 1395, | SelectKBest algorithm, RFE                                                       | SVM                                                                                                                       | Internal validation                      | AUC 0.808          | Treatment response                                  | [117] |
| P    | 50  | T1CE, T2                 | 214   | Sequential                                                                       | SVM                                                                                                                       | Cross-validation                         | AUC 0.78           | recurrence                                          | [118] |
| P    | 27  | T1CE                     | 255   | Student's t, mutual- information-based algorithm                                 | kNN, RF, SVM, MLP, LR                                                                                                     | Cross-validation                         |                    | recurrence                                          | [119] |
| P    | 194 | T1CE, T2                 | 194   | LASSO                                                                            | SVM                                                                                                                       | Internal validation                      | AUC 0.826          | Sinus invasion                                      | [106] |
| P    | 50  | T1, T2, DCE              | 57    | ICC, Spearman correlation, Mann-Whitney U, t-test                                | LR                                                                                                                        |                                          | AUC 0.957          | vascular heterogeneity and aggressiveness           | [107] |
| P    | 89  | T2                       | 1118  | ICC, variance, correlation matrix, RFE                                           | Extra Trees                                                                                                               | Internal validation                      | AUC 0.99           | consistency                                         | [105] |
| P    | 158 | T1, T1CE, T2T1CE, T1, T2 | 4683  | Wilcoxon rank sum test, Elastic net, RFE                                         | SVM                                                                                                                       | Internal validation, Multicentric cohort | AUC 0.81*          | consistency                                         | [103] |
| P    | 69  | T1CE, T2                 | 214   | LASSO                                                                            | LR                                                                                                                        | Cross-validation                         | AUC 0.834          | Granulation pattern                                 | [115] |
| P    | 89  | T2                       | 1128  | 8 feature selection algorithms                                                   | kNN                                                                                                                       | Internal validation                      | AUC 0.87           | Proliferative index                                 | [113] |
| P    | 138 | T1, T1CE, T2,            | 4683  | Wilcoxon rank sum test, LASSO, Elastic net, RFE                                  | SVM                                                                                                                       | Internal validation, external validation | AUC 0.89           | proliferative index                                 | [114] |
| Schw | 336 | T2                       | 1736  | t-test, LASSOx                                                                   | SVM                                                                                                                       | Internal validation                      | AUC up to 0.881    | Pseudoprogression                                   | [120] |

|      |     |                                |      |                           |                                 |                  |                           |              |       |
|------|-----|--------------------------------|------|---------------------------|---------------------------------|------------------|---------------------------|--------------|-------|
| Schw | 85  | T1CE, T1CE, T2                 | 126  | Single feature vector     | SVM                             | Cross-validation | AUC 0.93                  | Prognosis    | [121] |
| Schw | 191 |                                | 3918 | ICC, t-test, LASSO, ANOVA | LR, RF, SVM, decision tree      | Cross-validation | AUC 0.9                   | Blood supply | [123] |
| V    | 141 | T1, T1CE, T2,<br>FLAIR, T2 GRE | 78   | SVM                       | SVM, binary classification tree | Cross-validation | Accuracy more than<br>92% | Tumor entity | [15]  |

\*including clinical predictors. Abbreviations feature selection/model building: AUC – area under the curve, DT – decision tree, GLM – generalized linear model, ICC – intraclass correlation coefficient, KNN – k nearest neighbour, LASSO – least absolute shrinkage and selection operator, LDA – linear discriminant analysis, LR – logistic regression, MLP – multilayer perception, mRMR – minimum redundancy maximum relevance, NB – Naïve Bayes, NN – neural network, PCA – principal component analysis, RF – random forest, SMOTE – synthetic minority over-sampling technique, SVM – support vector machine. Abbreviations tumor entities: BM – brain metastasis, CSF – cerebrospinal fluid, GBM – Glioblastoma, L – Lymphoma, M – meningioma, MB – Medulloblastoma, P – pituitary tumors, Schw – Schwannoma, V – various. Abbreviations imaging: ADC – apparent diffusion coefficient, APTw – Amide proton transfer weighted, C-MET – <sup>11</sup>C methionine, CE – contrast enhanced, CT – computed tomography, DCE – dynamic contrast enhanced, DTI – diffusion tensor imaging, DWI – diffusion-weighted imaging, FET – <sup>18</sup>F-fluoroethyltyrosine, FLAIR – fluid-attenuated inversion recovery, FLASH – fast, low angle shot, GRE – gradient echo, PET – positron emission tomography, T1 – T1 weighted, T2 – T2 weighted, SWI – susceptibility-weighted imaging.
